# Supplementary material
Source: MDPI journal article supplement (https://www.mdpi.com/2379-139X/8/2/58)
Supplement: s1 [file s1]

## Supplemental Material

**Table S1. Standardized ACRIN 6698 MRI Acquisition Parameters**

| Parameter                          | T2-weighted                                 | DW-MRI                                | T1-weighted                       |
|------------------------------------|---------------------------------------------|---------------------------------------|-----------------------------------|
| Sequence type                      | FSE or STIR                                 | DW SE-EPI                             | GE                                |
| 2D or 3D sequence                  | 2D                                          | 2D                                    | 3D                                |
| Slice orientation                  | Axial or sagittal                           | Axial                                 | Axial                             |
| Laterality                         | Bilateral                                   | Bilateral                             | Bilateral                         |
| Frequency direction                | A/P                                         | A/P                                   | A/P                               |
| Phase direction                    | R/L (axial)<br>S/I (sagittal)               | R/L                                   | R/L                               |
| *FOV – frequency                   | 260-360 mm (axial)<br>180-220 mm (sagittal) | 260-360 mm                            | 260-360 mm                        |
| *FOV - phase                       | 260-360 mm (axial)<br>180-220 mm (sagittal) | 300-360mm                             | 260-360 mm                        |
| Matrix – frequency (acquired)      | 256-512                                     | 128-192                               | 384-512                           |
| Matrix – phase (acquired)          | ≥ 256                                       | 128-192                               | ≥ 256                             |
| Reconstruction Matrix              | 512 x 512                                   | 256 x 256                             | 512 x 512                         |
| In-plane resolution                | ≤ 1.4 mm                                    | 1.7 – 2.8 mm                          | ≤ 1.4 mm                          |
| Fat-suppression                    | Active fat-sat recommended                  | Active fat-sat                        | Active fat-sat recommended        |
| Repetition Time (TR)               | 2000-10000 ms                               | ≥ 4,000 ms                            | 4-10 ms                           |
| Echo Time (TE)                     | 70-140 ms<br>(STIR 70 ms)                   | Minimum                               | Minimum                           |
| Echo Train Length                  | ≤ 16                                        | N/A                                   | N/A                               |
| Inversion Time (TI; STIR sequence) | 170 ms (1.5T)<br>230 ms (3.0T)              | N/A                                   | N/A                               |
| Flip Angle                         | 90 degrees                                  | 90 degrees                            | 10-20 degrees                     |
| Readout Bandwidth (per pixel)      | N/A                                         | N/A                                   | Maximum                           |
| <i>b</i> -values                   | N/A                                         | 0, 100, 600, 800 s/mm <sup>2</sup>    |                                   |
| Slice thickness (acquired)         | ≤ 4 mm                                      | 4-5 mm                                | ≤ 2.5 mm                          |
| Number of slices                   | Variable; complete bilateral coverage       | Variable; complete bilateral coverage | ≥ 60; complete bilateral coverage |
| Slice Gap                          | ≤ 1.0 mm                                    | No gap                                | No gap                            |
| Parallel imaging factor            | ≤ 2                                         | ≥ 2                                   | ≤ 2                               |
| No. of excitations or averages     | ≤ 2                                         | ≥ 2                                   | ≤ 2                               |

|                                                 |             |             |                                       |
|-------------------------------------------------|-------------|-------------|---------------------------------------|
| <b>k-space ordering</b>                         | N/A         | N/A         | -k to +k<br>standard, non-<br>centric |
| <b>Sequence acquisition<br/>time</b>            | ≤ 7 minutes | ≤ 5 minutes | 80 sec ≤ scan time ≤<br>100 sec       |
| <b>Total post-contrast<br/>imaging duration</b> | N/A         | N/A         | ≥ 8 minutes<br>following injection    |

Abbreviations: FSE = fast spin echo, STIR = short tau inversion recovery, DW = diffusion-weighted, SE = spin echo, EPI = echo planar imaging, GE = gradient echo, 2D = two dimensional, 3D = three dimensional, A/P = anterior-posterior, R/L = right-left, S/I = superior-inferior, FOV = field-of-view, N/A = not applicable

**Table S2. MR imaging systems utilized for the primary analysis and test-retest cohorts.**

|                       | <b>Analysis Set<br/>N=210</b> | <b>Test-Retest Set<br/>N=71</b> |
|-----------------------|-------------------------------|---------------------------------|
| <b>Vendor</b>         | <b>n (%)</b>                  | <b>n (%)</b>                    |
| <b>GE</b>             | 155 (73.8)                    | 28 (39.4)                       |
| <b>Siemens</b>        | 30 (14.3)                     | 12 (16.9)                       |
| <b>Philips</b>        | 25 (11.9)                     | 31 (43.7)                       |
| <b>Field Strength</b> |                               |                                 |
| <b>1.5 tesla</b>      | 148 (70.5)                    | 44 (62.0)                       |
| <b>3.0 tesla</b>      | 62 (29.5)                     | 27 (38.0)                       |

### **Sample Size Estimates**

The sample size projection for the ACRIN 6698 trial was designed to achieve 90% power for the primary analysis to test whether the change in tumor ADC from baseline to the early treatment time point is predictive of pathologic complete response. Specifically, the sample size was calculated to detect a difference of 0.15 between the AUC under the null hypothesis of 0.5 and an AUC under the alternative hypothesis of 0.65 using a one-sided Z-test at a significance level of 0.05. It was

assumed that the number of pCR non-responders is approximately 2.7 times greater than the number of complete responders based on the ACRIN 6657 study, requiring a total of 160 analyzable patients (43 responders and 117 non-responders).

We assumed 20% of the cases accrued would not provide usable data for the analysis, for example, having missing MRI scans out of four MRI scans per participant, and assumed a 45% loss rate due to patients who are screened but do not proceed to the treatment phase of I-SPY 2. Additionally, 10% drop out rate is expected. Therefore, target enrollment was set at approximately 404 participants after accounting for the above three conditions.

### **Participating Institutions**

University of California, San Francisco, CA

University of Washington, Seattle, WA

University of California, San Diego, CA

H. Lee Moffitt Cancer Center and Research Institute, Tampa, FL

University of Alabama, Birmingham, AL

University of Texas MD Anderson Cancer Center, Houston, TX

University of Chicago, Chicago, IL

Oregon Health and Science University, Portland, OR

University of Minnesota, Minneapolis, MN

University of Pennsylvania, Philadelphia, PA
